Supplementary Figure 3. *Ex vivo* patient HBV-specific CD8+ T cell induction by SLP in the presence or absence of adjuvant.

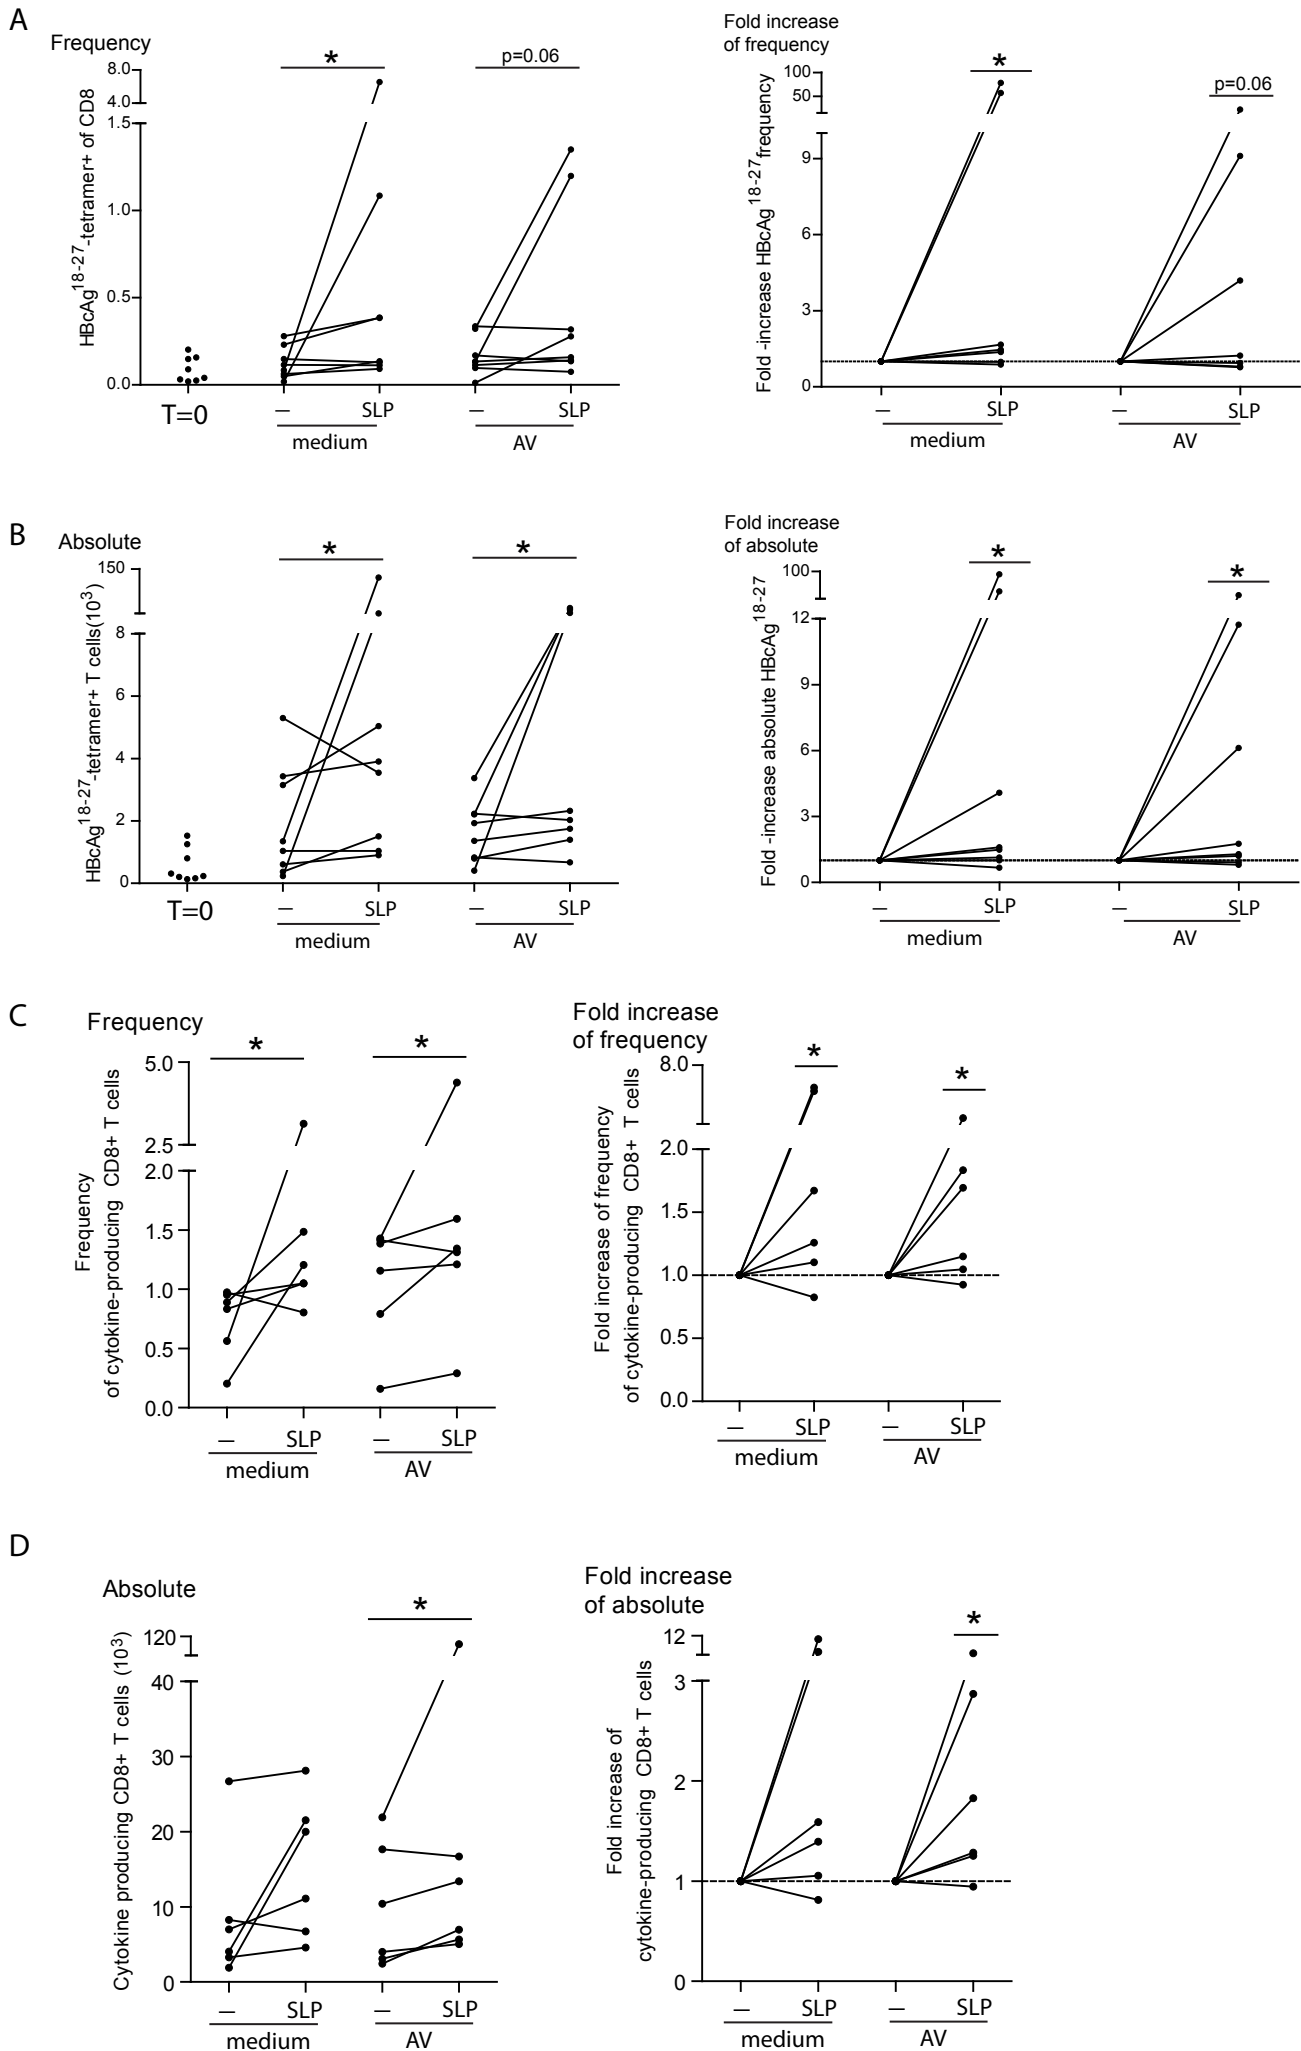

Source: https://academic.oup.com/jid/article-pdf/217/5/827/23933209/jix614.pdf
